# Supplementary material for: Performance Analysis of a Waste-to-Energy System Integrated with the Steam–Water Cycle and Urea Hydrolysis Process of a Coal-Fired Power Unit
Source: MDPI journal article supplement (doi:10.3390/app12020866), 2022-01-15
Supplement: s1 [file s1]

**Table S1.** Detailed cash flows of the WTE project under the stand-alone design.

| Year (i) | Cash flows (M\$) |            |                                |            |               |              |              |        |        |
|----------|------------------|------------|--------------------------------|------------|---------------|--------------|--------------|--------|--------|
|          | Cash inflow      | Investment | Operation and maintenance cost | Income tax | Net cash flow | Tax rate (%) | Discount (%) | NPVi   | NPV    |
| 1        | 0.00             | 13.24      | 0.00                           | 0.00       | -13.24        | 0.00         | 0.00         | -13.24 | -13.24 |
| 2        | 0.00             | 13.24      | 0.00                           | 0.00       | -13.24        | 0.00         | 0.00         | -13.24 | -26.49 |
| 3        | 7.50             | 0.00       | 2.65                           | 0.00       | 4.85          | 0.00         | 8.00         | 3.85   | -22.64 |
| 4        | 7.50             | 0.00       | 2.65                           | 0.00       | 4.85          | 0.00         | 8.00         | 3.56   | -19.07 |
| 5        | 7.50             | 0.00       | 2.65                           | 0.00       | 4.85          | 0.00         | 8.00         | 3.30   | -15.77 |
| 6        | 7.50             | 0.00       | 2.65                           | 0.61       | 4.24          | 12.50        | 8.00         | 2.67   | -13.10 |
| 7        | 7.50             | 0.00       | 2.65                           | 0.61       | 4.24          | 12.50        | 8.00         | 2.48   | -10.62 |
| 8        | 7.50             | 0.00       | 2.65                           | 0.61       | 4.24          | 12.50        | 8.00         | 2.29   | -8.33  |
| 9        | 7.50             | 0.00       | 2.65                           | 1.21       | 3.64          | 25.00        | 8.00         | 1.82   | -6.51  |
| 10       | 7.50             | 0.00       | 2.65                           | 1.21       | 3.64          | 25.00        | 8.00         | 1.68   | -4.82  |
| 11       | 7.50             | 0.00       | 2.65                           | 1.21       | 3.64          | 25.00        | 8.00         | 1.56   | -3.26  |
| 12       | 7.50             | 0.00       | 2.65                           | 1.21       | 3.64          | 25.00        | 8.00         | 1.44   | -1.82  |
| 13       | 7.50             | 0.00       | 2.65                           | 1.21       | 3.64          | 25.00        | 8.00         | 1.34   | -0.48  |
| 14       | 7.50             | 0.00       | 2.65                           | 1.21       | 3.64          | 25.00        | 8.00         | 1.24   | 0.76   |
| 15       | 7.50             | 0.00       | 2.65                           | 1.21       | 3.64          | 25.00        | 8.00         | 1.15   | 1.90   |
| 16       | 7.50             | 0.00       | 2.65                           | 1.21       | 3.64          | 25.00        | 8.00         | 1.06   | 2.97   |
| 17       | 7.50             | 0.00       | 2.65                           | 1.21       | 3.64          | 25.00        | 8.00         | 0.98   | 3.95   |
| 18       | 7.50             | 0.00       | 2.65                           | 1.21       | 3.64          | 25.00        | 8.00         | 0.91   | 4.86   |
| 19       | 7.50             | 0.00       | 2.65                           | 1.21       | 3.64          | 25.00        | 8.00         | 0.84   | 5.70   |
| 20       | 7.50             | 0.00       | 2.65                           | 1.21       | 3.64          | 25.00        | 8.00         | 0.78   | 6.48   |
| 21       | 7.50             | 0.00       | 2.65                           | 1.21       | 3.64          | 25.00        | 8.00         | 0.72   | 7.20   |
| 22       | 7.50             | 0.00       | 2.65                           | 1.21       | 3.64          | 25.00        | 8.00         | 0.67   | 7.87   |
| 23       | 7.50             | 0.00       | 2.65                           | 1.21       | 3.64          | 25.00        | 8.00         | 0.62   | 8.49   |
| 24       | 7.50             | 0.00       | 2.65                           | 1.21       | 3.64          | 25.00        | 8.00         | 0.57   | 9.07   |
| 25       | 7.50             | 0.00       | 2.65                           | 1.21       | 3.64          | 25.00        | 8.00         | 0.53   | 9.60   |

**Table S2.** Detailed cash flows of the WTE project under the integrated design.

| Year (i) | Cash flows (M\$) |            |                                |            |               |              |              |        |        |
|----------|------------------|------------|--------------------------------|------------|---------------|--------------|--------------|--------|--------|
|          | Cash inflow      | Investment | Operation and maintenance cost | Income tax | Net cash flow | Tax rate (%) | Discount (%) | NPVi   | NPV    |
| 1        | 0.00             | 10.67      | 0.00                           | 0.00       | -10.67        | 0.00         | 0.00         | -10.67 | -10.67 |
| 2        | 0.00             | 10.67      | 0.00                           | 0.00       | -10.67        | 0.00         | 0.00         | -10.67 | -21.34 |
| 3        | 8.23             | 0.00       | 2.13                           | 0.00       | 6.10          | 0.00         | 8.00         | 4.84   | -16.50 |
| 4        | 8.23             | 0.00       | 2.13                           | 0.00       | 6.10          | 0.00         | 8.00         | 4.48   | -12.02 |
| 5        | 8.23             | 0.00       | 2.13                           | 0.00       | 6.10          | 0.00         | 8.00         | 4.15   | -7.87  |
| 6        | 8.23             | 0.00       | 2.13                           | 0.76       | 5.33          | 12.50        | 8.00         | 3.36   | -4.51  |
| 7        | 8.23             | 0.00       | 2.13                           | 0.76       | 5.33          | 12.50        | 8.00         | 3.11   | -1.40  |
| 8        | 8.23             | 0.00       | 2.13                           | 0.76       | 5.33          | 12.50        | 8.00         | 2.88   | 1.49   |
| 9        | 8.23             | 0.00       | 2.13                           | 1.52       | 4.57          | 25.00        | 8.00         | 2.29   | 3.77   |
| 10       | 8.23             | 0.00       | 2.13                           | 1.52       | 4.57          | 25.00        | 8.00         | 2.12   | 5.89   |
| 11       | 8.23             | 0.00       | 2.13                           | 1.52       | 4.57          | 25.00        | 8.00         | 1.96   | 7.85   |
| 12       | 8.23             | 0.00       | 2.13                           | 1.52       | 4.57          | 25.00        | 8.00         | 1.82   | 9.67   |
| 13       | 8.23             | 0.00       | 2.13                           | 1.52       | 4.57          | 25.00        | 8.00         | 1.68   | 11.35  |
| 14       | 8.23             | 0.00       | 2.13                           | 1.52       | 4.57          | 25.00        | 8.00         | 1.56   | 12.91  |
| 15       | 8.23             | 0.00       | 2.13                           | 1.52       | 4.57          | 25.00        | 8.00         | 1.44   | 14.35  |
| 16       | 8.23             | 0.00       | 2.13                           | 1.52       | 4.57          | 25.00        | 8.00         | 1.33   | 15.68  |
| 17       | 8.23             | 0.00       | 2.13                           | 1.52       | 4.57          | 25.00        | 8.00         | 1.24   | 16.92  |
| 18       | 8.23             | 0.00       | 2.13                           | 1.52       | 4.57          | 25.00        | 8.00         | 1.14   | 18.06  |
| 19       | 8.23             | 0.00       | 2.13                           | 1.52       | 4.57          | 25.00        | 8.00         | 1.06   | 19.12  |
| 20       | 8.23             | 0.00       | 2.65                           | 1.52       | 4.57          | 25.00        | 8.00         | 0.98   | 20.10  |
| 21       | 8.23             | 0.00       | 2.65                           | 1.52       | 4.57          | 25.00        | 8.00         | 0.91   | 21.01  |
| 22       | 8.23             | 0.00       | 2.65                           | 1.52       | 4.57          | 25.00        | 8.00         | 0.84   | 21.85  |
| 23       | 8.23             | 0.00       | 2.65                           | 1.52       | 4.57          | 25.00        | 8.00         | 0.78   | 22.63  |
| 24       | 8.23             | 0.00       | 2.65                           | 1.52       | 4.57          | 25.00        | 8.00         | 0.72   | 23.35  |
| 25       | 8.23             | 0.00       | 2.65                           | 1.52       | 4.57          | 25.00        | 8.00         | 0.67   | 24.02  |

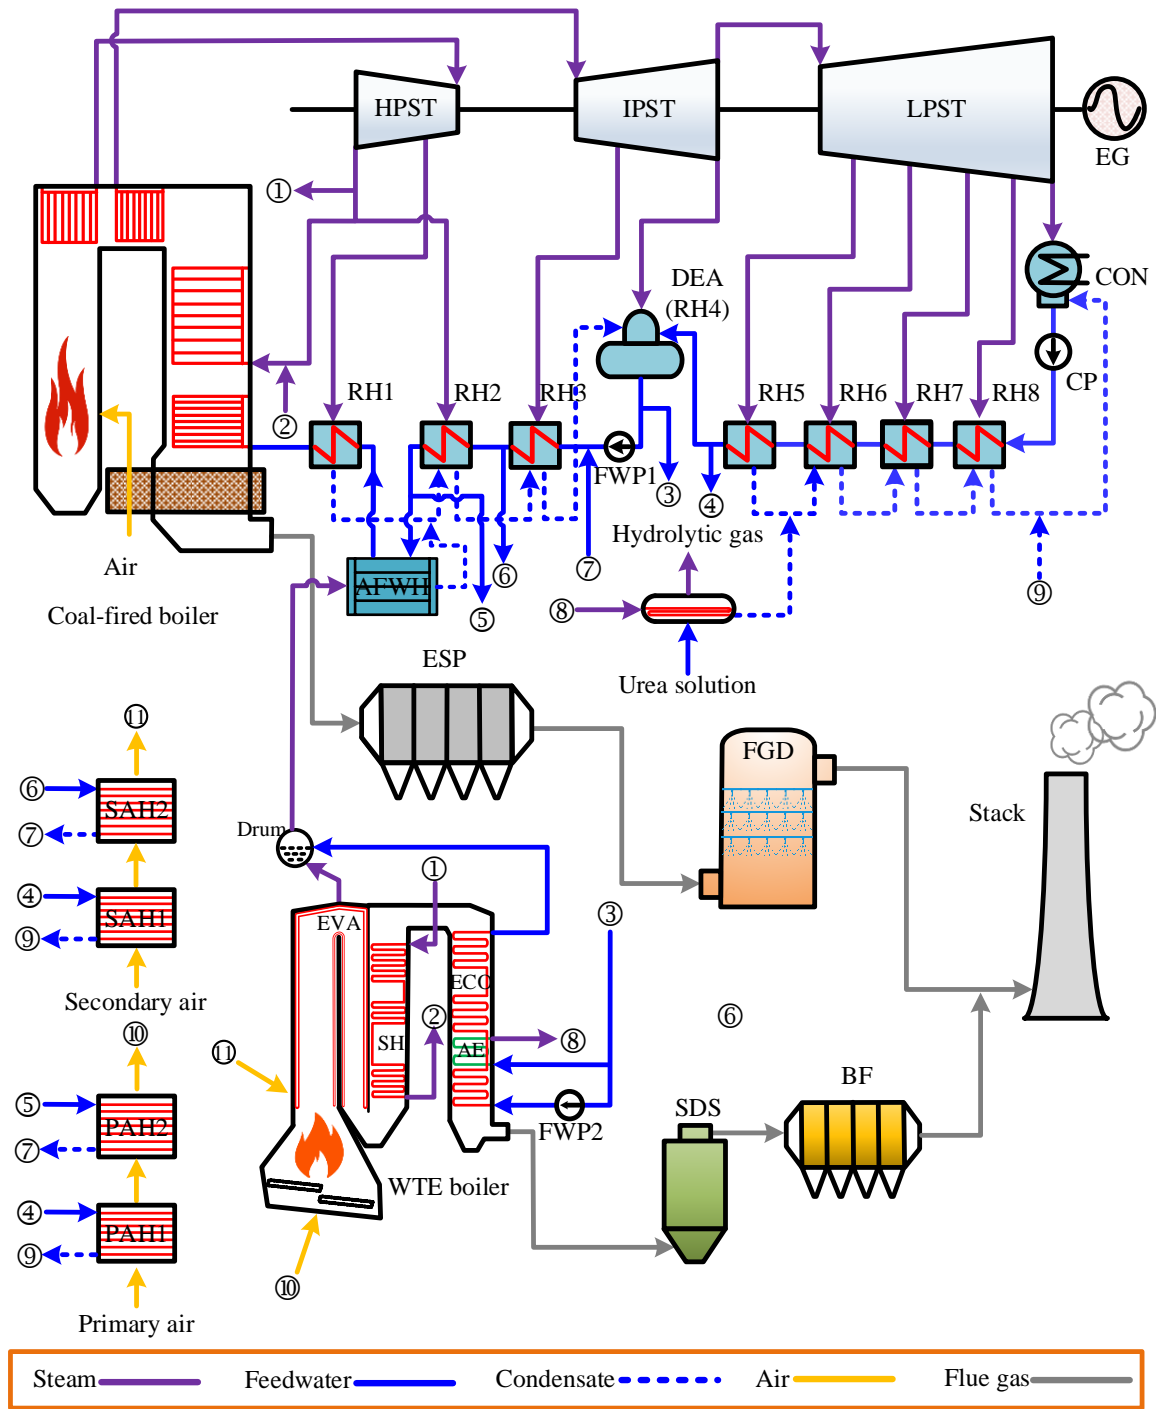

(a) Mode 1

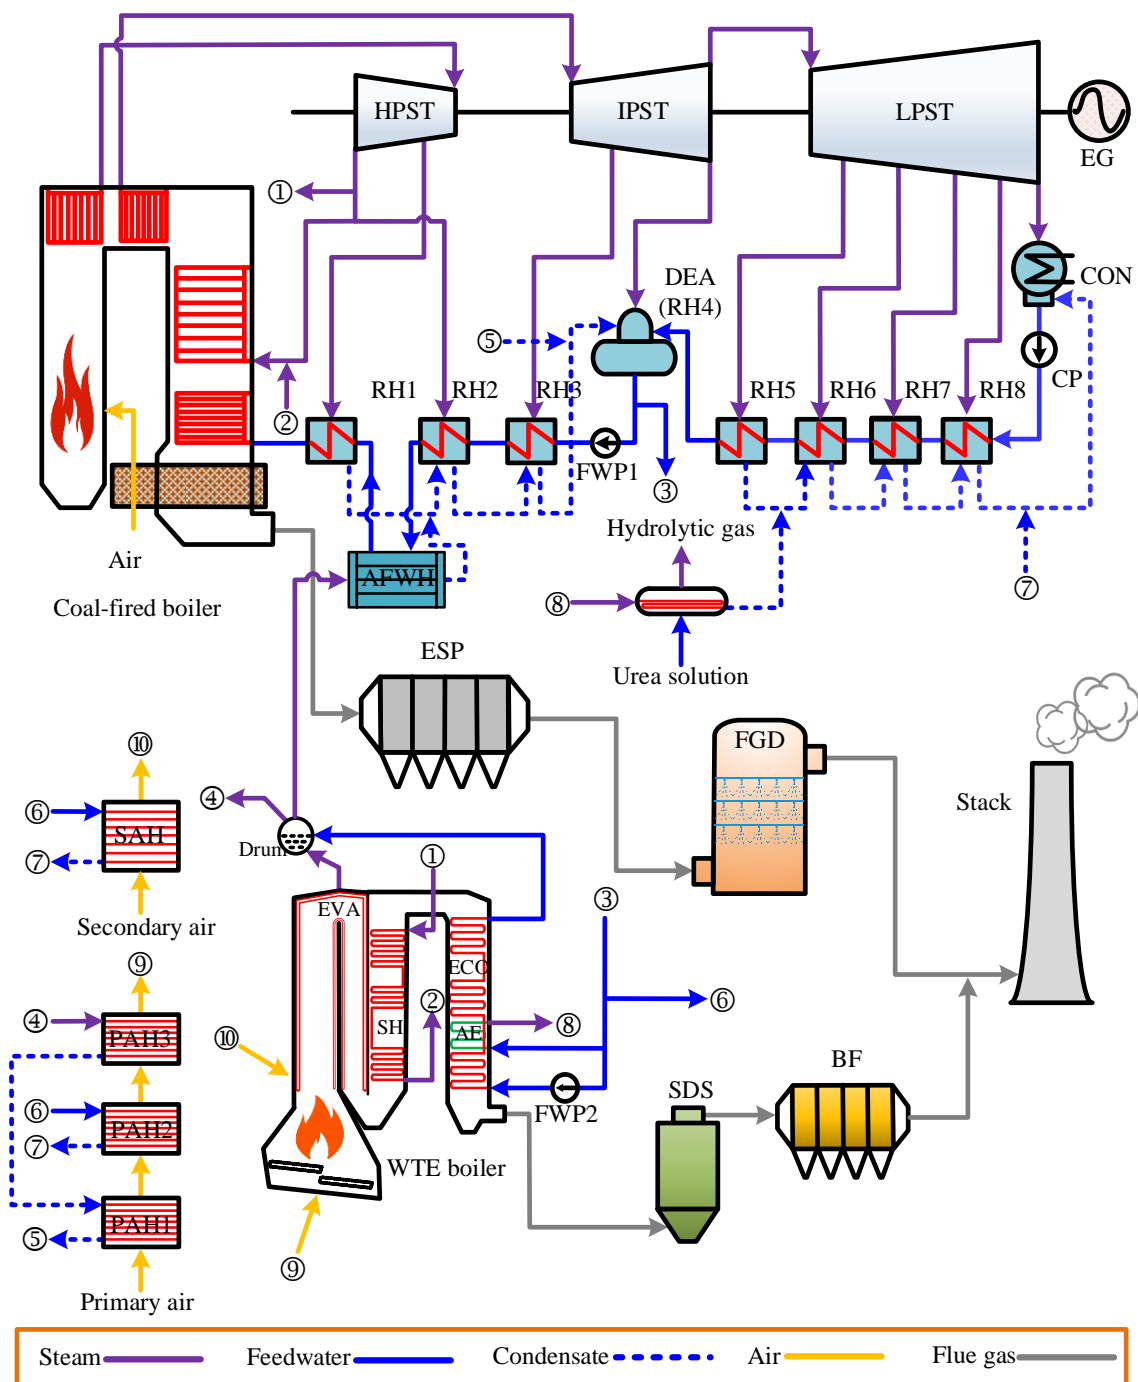

(b) Mode 2

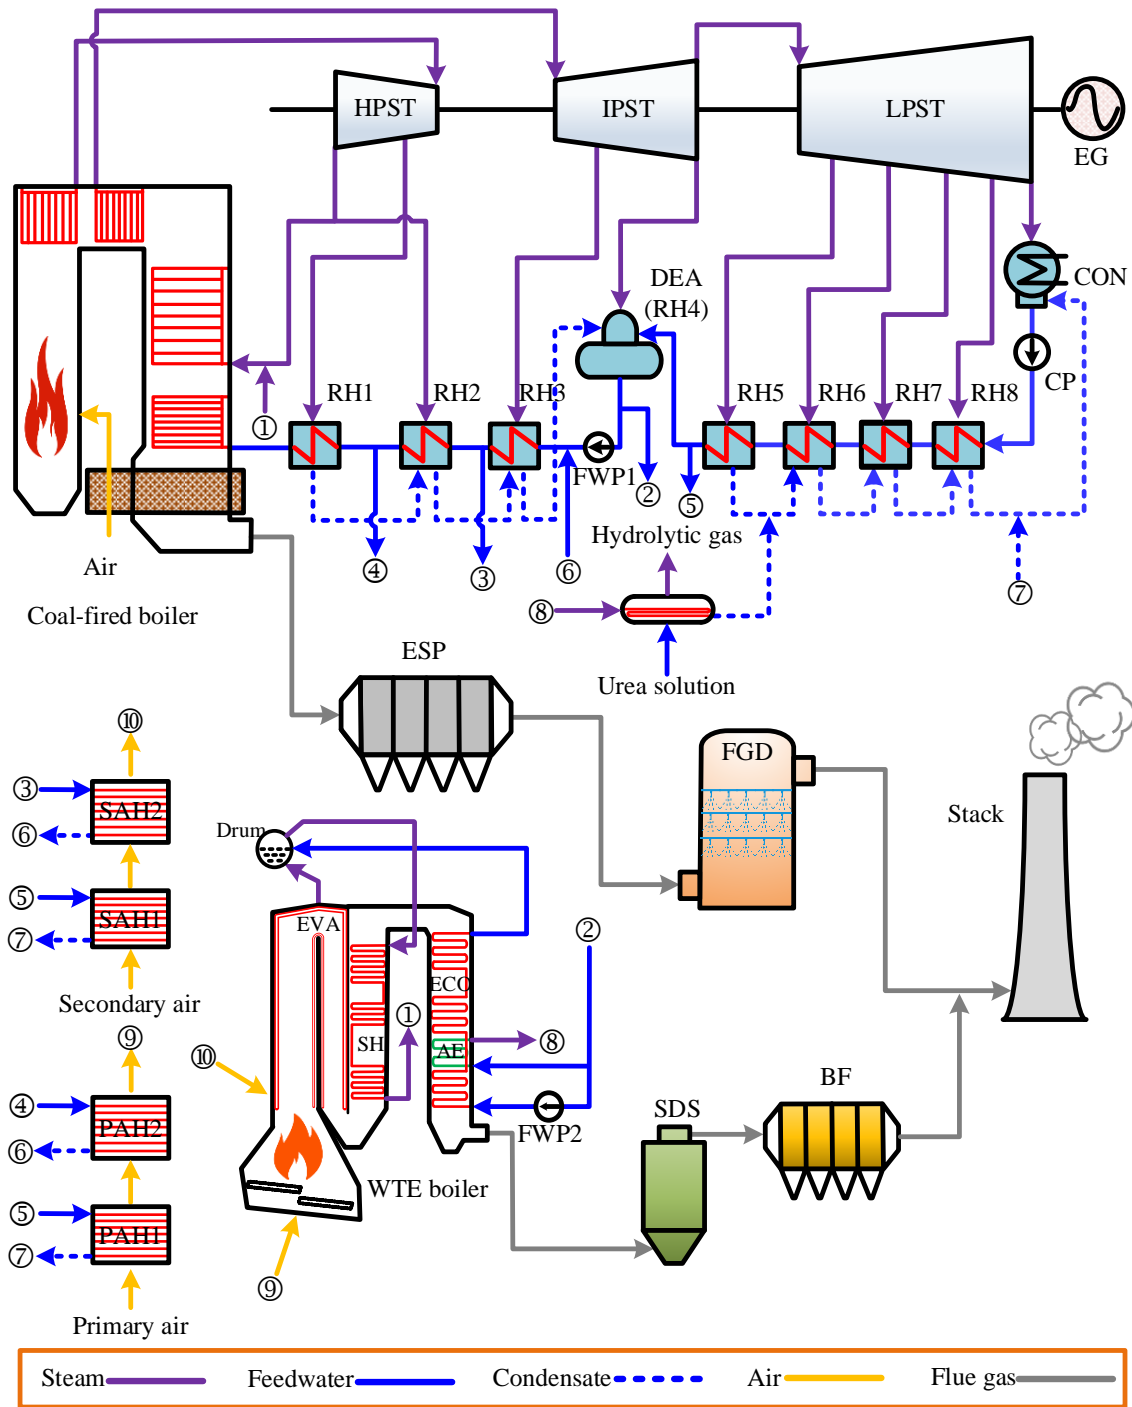

(c) Mode 3

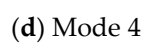

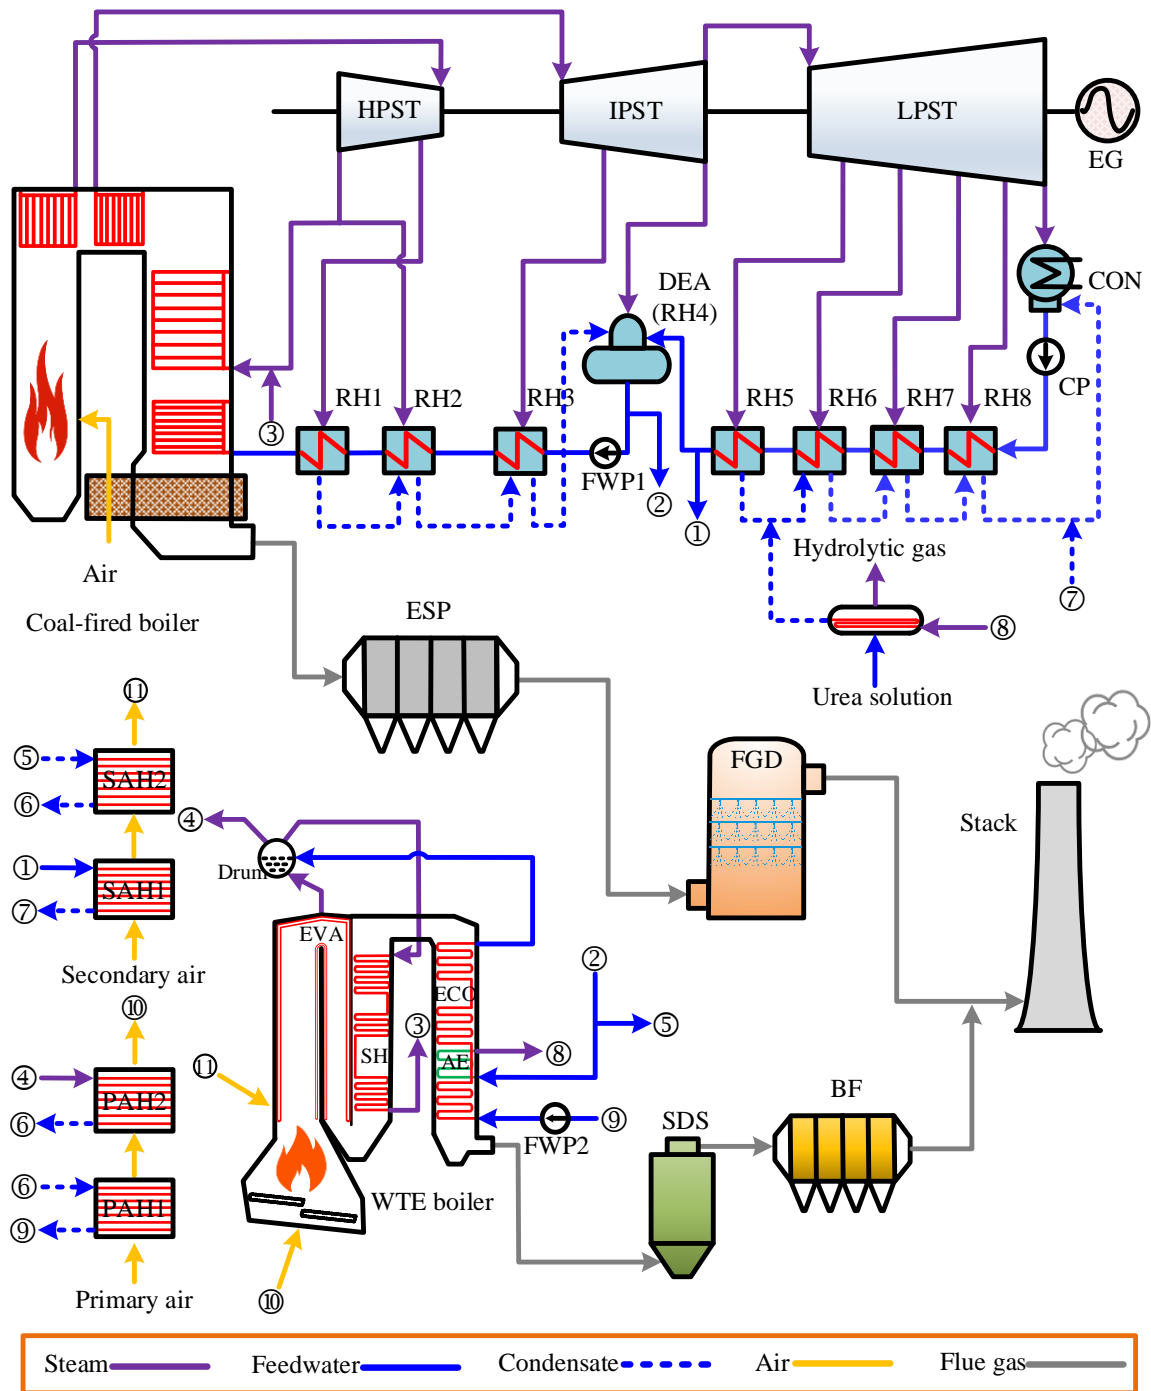

(e) Mode 5

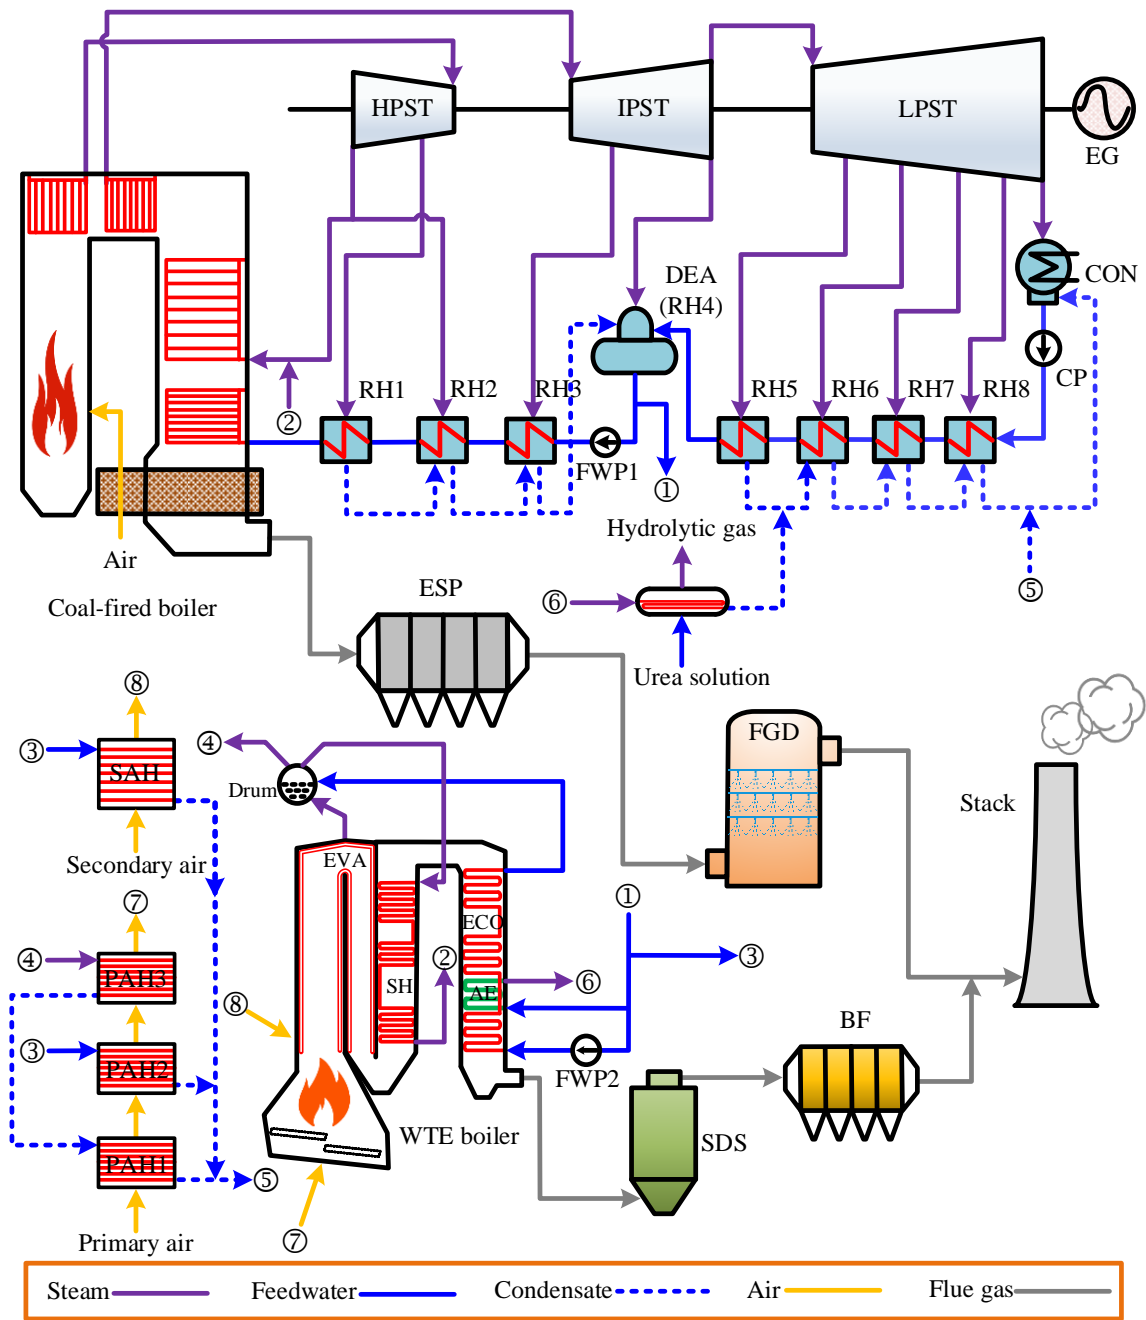

(f) Mode 6



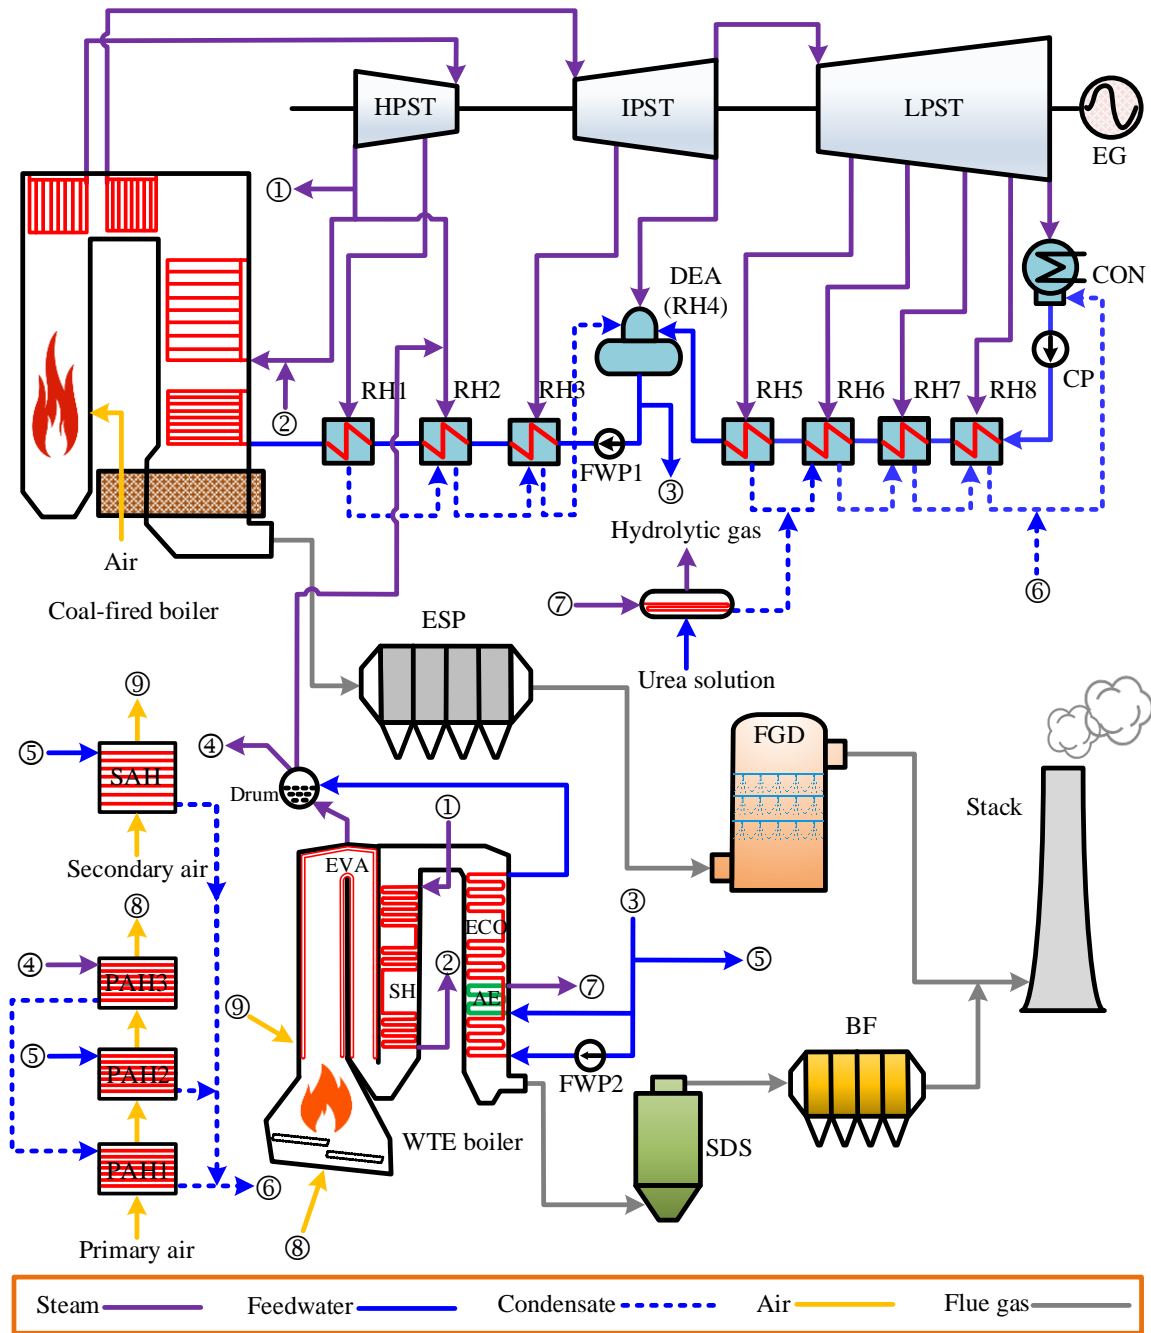

(g) Mode 7

Figure S1. Flowcharts of different integrated modes.
